# Supplementary material
Source: PubMed Central journal article supplement (PMC4275412)

## SUPPLEMENTARY INFORMATION

### Supplemental Figure legends

**Supplemental Figure 1. Correlation between *miR-124* levels and individual hypoxia/HIF signature targets.** (a) Gene Set Enrichment Analysis showing a negative correlation between a hypoxia gene signature and *miR-124* levels. Red dots = *miR-124* levels for each individual TCGA patient (log scale). Heatmap shows individual levels of each patient sample. Orange = high level of mRNA expression. Blue = low level of mRNA expression. (b) Laser-Capture microdissection images before (left) and after the dissection (right). Red line indicates necrotic sample that was discarded as waste. Green line indicates perinecrotic area that was collected after disposal of necrotic sample.

*This supplemental figure refers to Figure 1 in the manuscript.*

**Supplemental Figure 2. *miR-124* elicits increased cell death under stress.** (a) U373-MG cells transfected with NT or *miR-124* mimics and grown in complete media, serum-free media, 0.5% O<sub>2</sub>, or a combination of serum-free media and 0.5% O<sub>2</sub> and imaged for viability. (b) Immunoblot showing increased levels of cleaved PARP upon *miR-124* + tunicamycin treatment.

*This supplemental figure refers to Figure 2 in the manuscript.*

**Supplemental Figure 3. *miR-124* and target levels measured from individual patient samples.** (a) *miR-124*, (b) *TEAD1*, (c) *SERP1* and (d) *MAPK14* expression analyzed by qRT-PCR from individual formalin-fixed, paraffin embedded patient samples. GBM sample number = 30. Normal brain sample number = 10.

*This supplemental figure refers to Figure 4 in the manuscript.*

**Supplemental Figure 4. Role of *miR-124* and targets in modulating cellular proliferation *in vitro*.** (a) Cell count of U87-MG cells expressing *miR-124* or a control scrambled miRNA. Cell count of U87-MG cells expressing control or (b) *TEAD1* shRNA, (c) *MAPK14* shRNA and (d) *SERP1* shRNA.

*This supplemental figure refers to Figure 5 in the manuscript.*

**Supplemental Figure 5. Determination of lentiviral and doxycycline-inducible systems *in vitro*.** (a) Flow cytometry analysis of Green Fluorescent Protein expression in Control-Dox expressing and 124-Dox expressing U87-MG cells. Time lapse of doxycycline administration up to 72 hours. FSC = Forward Scattering; Dox = Doxycycline. (b) qRT-PCR measuring *miR-124* levels upon doxycycline induction for a 72 hour time course. (c) GFP levels in control/pre-*miR-124* transduced U87-MG cells, 48 hours after transduction.

*This supplemental Figure refers to Figures 5 and 6 in the manuscript.*

**Table S1.** Oligo primer sequences of seed regions of partial 3'UTRs for *TEAD1*, *SERP1* and *MAPK14*.

hSERP1 WT1 F

GGCACTAGTaggtttcttc atgagtcatt ccaagtttc tagtccatac cacagtgcct tgcaaaaaac accacatgaa  
taaagcaataAAGCTTGGC

hSERP1 WT1 R

GCCAAGCTTtattgctttattcatgtggtgtttttgcaaggcactgtggtatggactagaaaacttggaatgactcatgaagaaacctACTAGTGCC

hSERP1 MUT1 F

GGCACTAGTaggtttcttc atgagtcatt ccaagtttc tagtccatac caca GCCAGCA gcaaaaaac accacatgaa  
taaagcaataAAGCTTGGC

hSERP1 MUT1 R

GCCAAGCTTtattgctttattcatgtggtgtttttgcTGCTGGCtgtggtatggactagaaaacttggaatgactcatgaagaaacctACTAGTGC  
C

hSERP1 WT2 F

GGCACTAGTttaaactaatt ctgtttatg gttgtgctaa attcatagca ggtgccttat tctttgcttt tagtcaaacc attccatataAAGCTTGGC

hSERP1 WT2 R

GCCAAGCTTgatatggaatggttgactaaaagcaagaataaggcacctgctatgaatttagcacaaccataaaacagaattagtaaACTAGT  
GCC

hSERP1 MUT 2 F

GGCACTAGTttaaactaatt ctgtttatg gttgtgctaa attcatagca g GCCAGCAGt tctttgcttt tagtcaaacc  
attccatataAAGCTTGGC

hSERP1 MUT2 R

GCCAAGCTTgatatggaatggttgactaaaagcaaagaaCTGCTGGCctgctatgaatttagcacaaccataaaacagaattagttaaACTA  
GTGCC

hTEAD1 WT1 F

GGCACTAGTtgttcccgta agcagtgct tagtaatacc ttagtcatgc cgccagcctt ttcttacaccAAGCTTGCC

hTEAD1 WT1 R

GCCAAGCTTggtgtaagaaaaggctggcggcatgactaaggattactaaggcactgcttacgggaacaACTAGTGCC

hTEAD1 MUT1 F

GGCACTAGTtgttcccgta agcaGCCAGC AGgtaatacc ttagtcatgc cgccagcctt ttcttacaccAAGCTTGCC

hTEAD1 MUT1 R

GCCAAGCTTggtgtaagaaaaggctggcggcatgactaaggattactGCTGGCtgcttacgggaacaACTAGTGCC

hTEAD1 WT2 F

GGCACTAGTttctgcactc tagcatgaaa gtcctttgg tttgagattc cagcttagaa aagtgtgccAAGCTTGCC

hTEAD1 WT2 R

GCCAAGCTTggcagcacttttctaagctggaatctcaaaccaaaggcactttcatgctagagtgacagaaACTAGTGCC

hTEAD1 MUT2 F

GGCACTAGTttctgcactc tagcatgaaa GCCAGCA~~tgg~~ tttgagattc cagcttagaa aagtgcgccAAGCTTGCC

hTEAD1 MUT2 R

GCCAAGCTTggcagcacttttcaagctggaatctcaaaccaTGCTGGC~~ttt~~catgctagagtcagaaACTAGTGCC

hP38 WT1 F

GGCACTAGT tatggttctc agatcttgac agtatattg aaactgtaa tatg~~ttt~~gtg ccttaaagg agagaagaaa gtgtagatag  
AAGCTTGCC

hP38 WT1 R

GCCAAGCTTctatctacactttctctcctttaaggcacaacatatttacagtttcaaataactgtcaagatctgagaaccataACTAGTGCC

hP38 MUT1 F

GGCACTAGT tatggttctc agatcttgac agtatattg aaactgtaa tatg~~ttt~~GCC AGCAGaaagg agagaagaaa gtgtagatag  
AAGCTTGCC

hP38 MUT1 R

GCCAAGCTTctatctacactttctctcctttCTGCTGGCaaacatatttacagtttcaaataactgtcaagatctgagaaccataACTAGTGC  
C

a

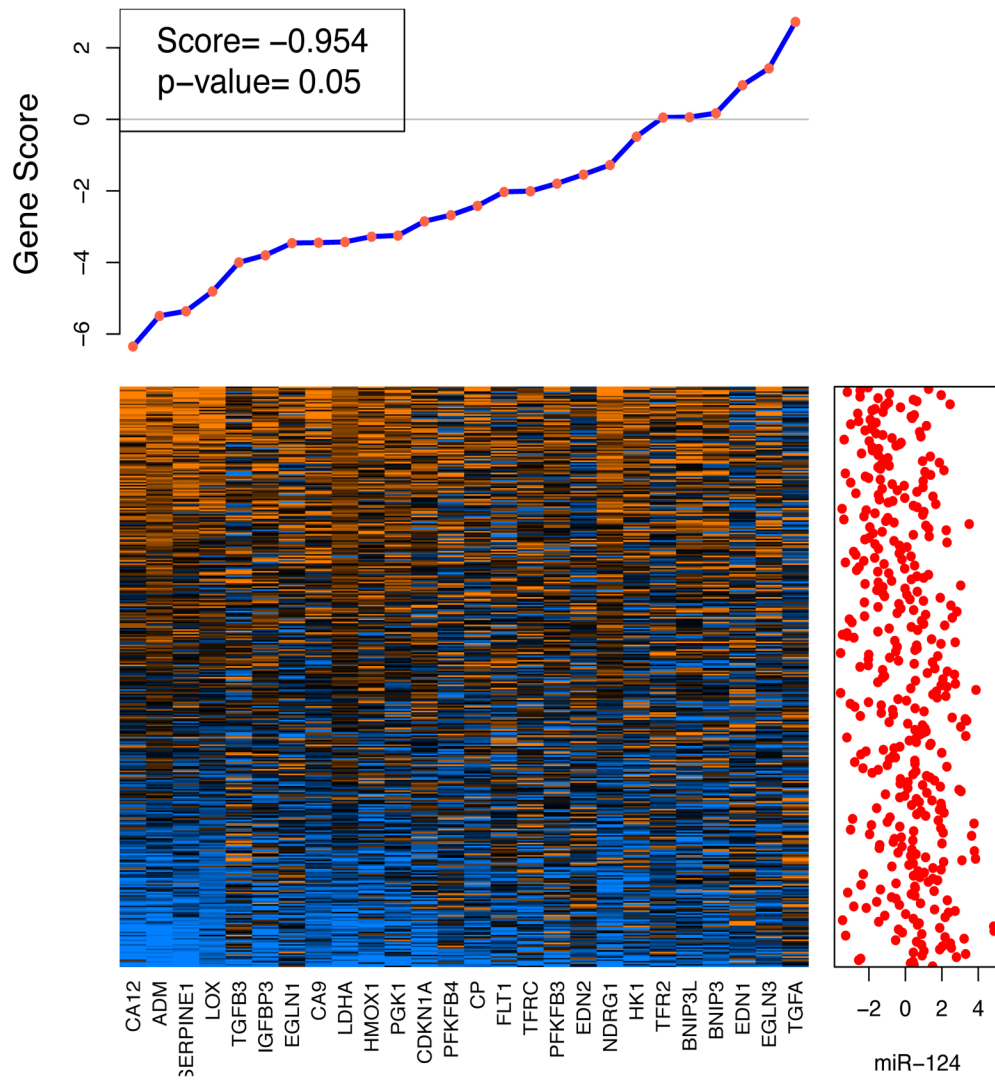

b

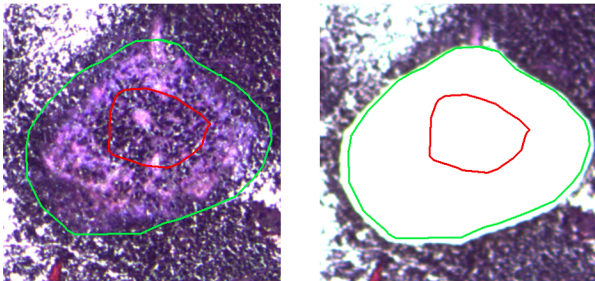

a

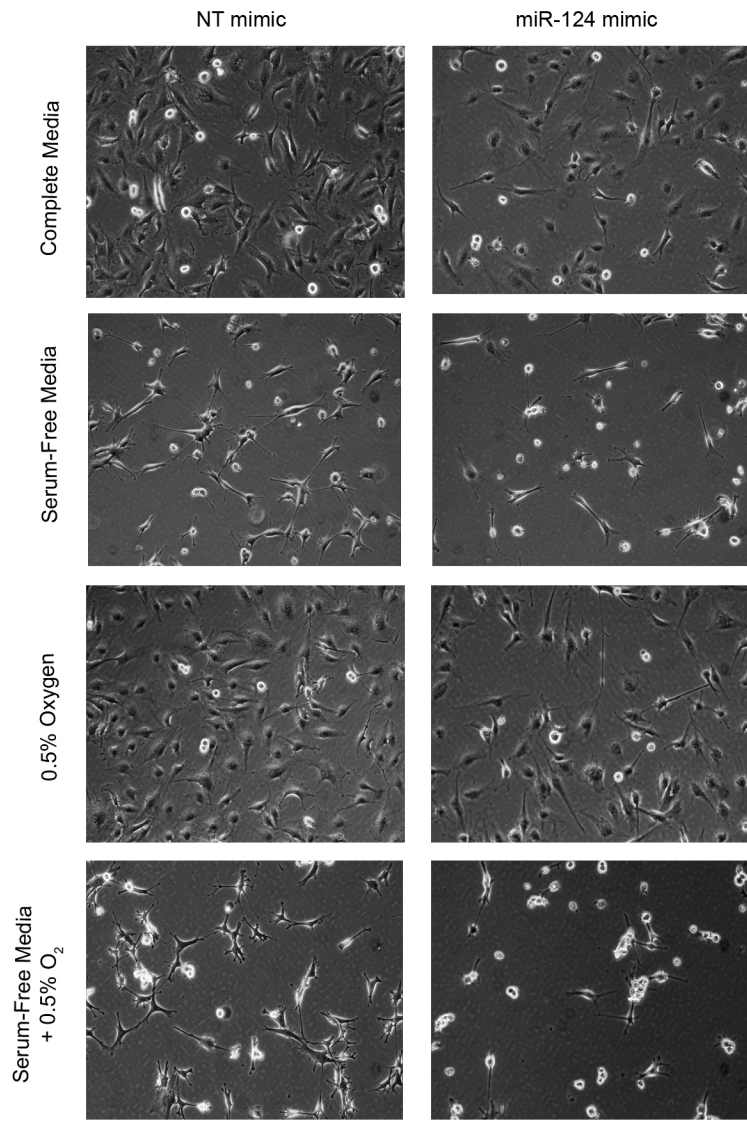

U373 - MG cells

b

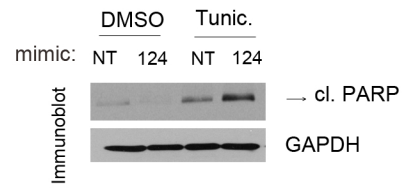

a

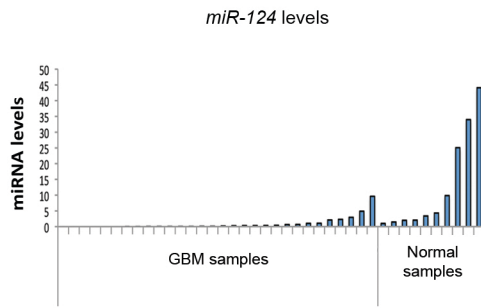

b

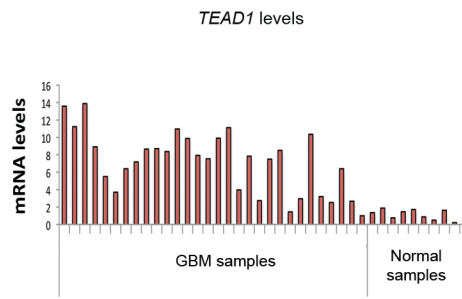

c

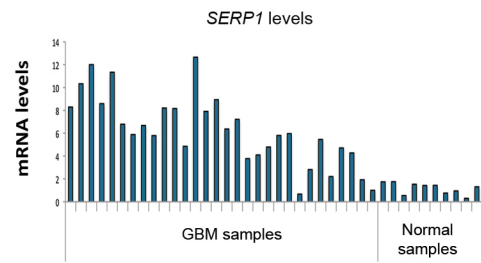

d

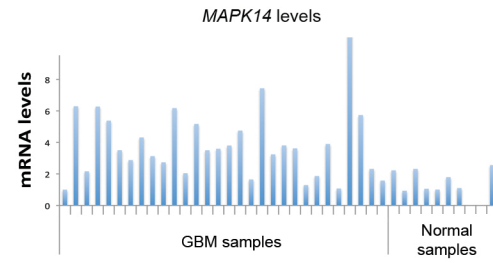

a

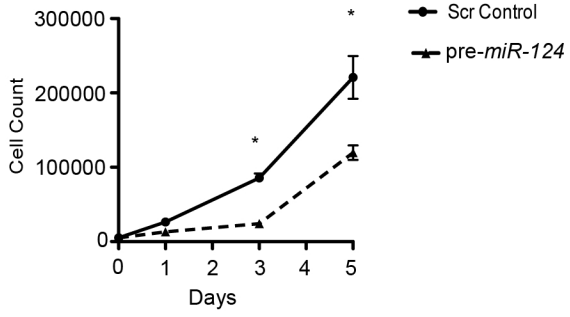

b

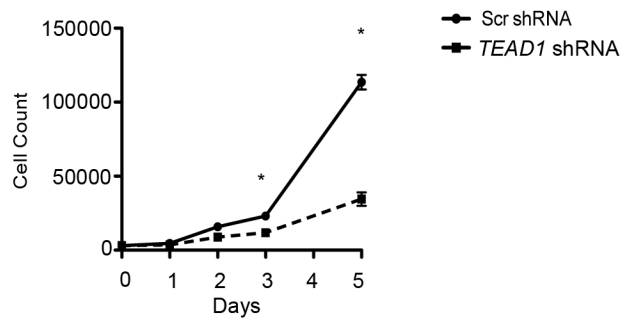

c

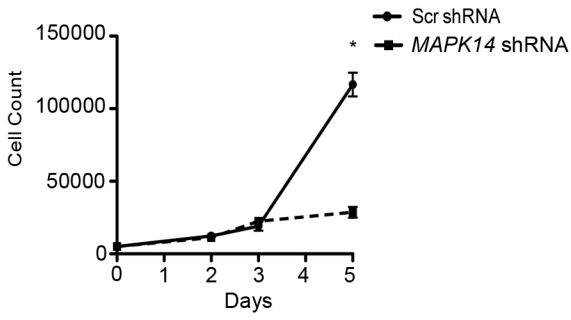

d

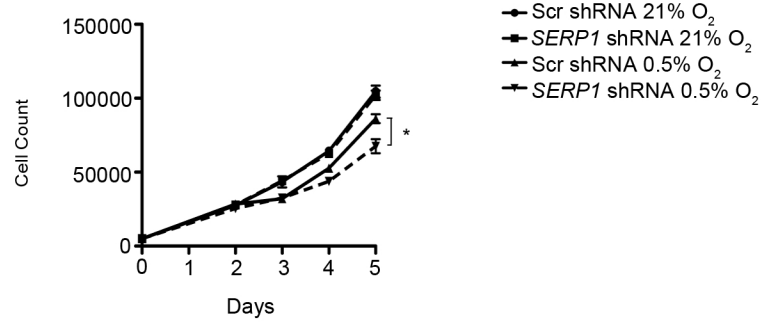



a

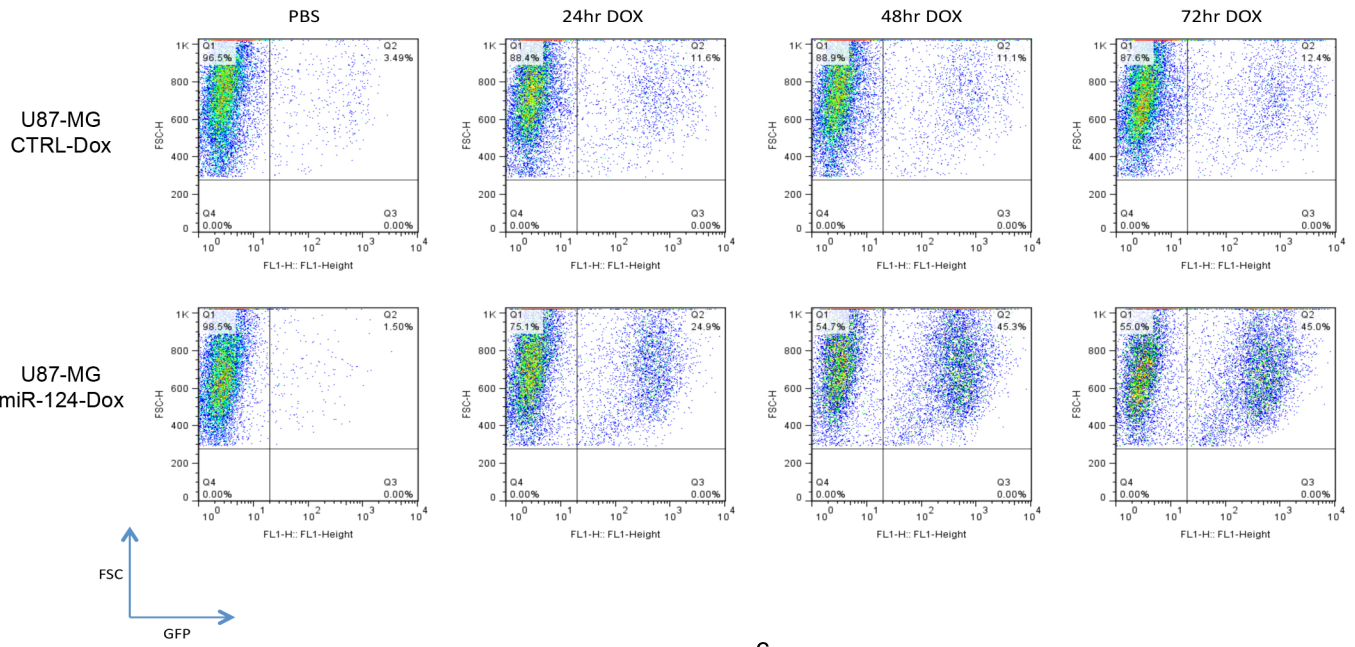

b

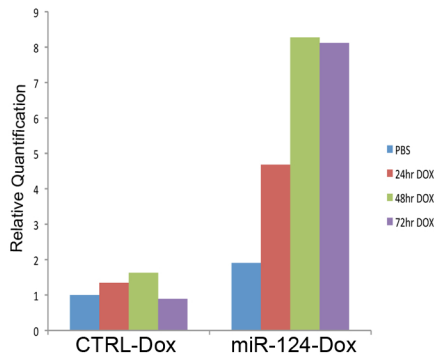

c

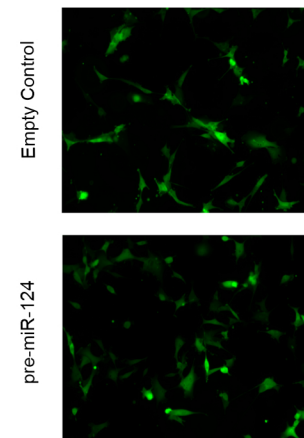

Supplement: NIHMS593235-supplement-1.pdf [file NIHMS593235-supplement-1.pdf]
